# Supplementary material for: On the lifespan of Enchytraeus crypticus - impact of iron (nanomaterial and salt) on aging
Source: publisher site journal article supplement (doi:10.18632/aging.206134), 2024-10-24
Supplement: Supplementary file [file aging-v16i20-206134-supplementary-material-SD1.pdf]

SUPPLEMENTARY FIGURE

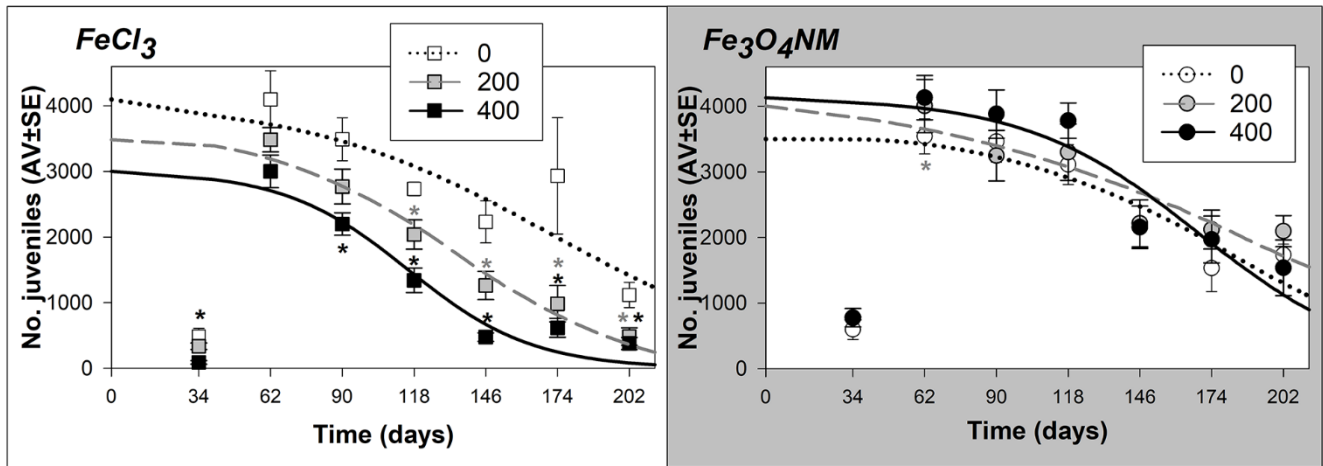

Supplementary Figure 1. Results from lifespan test with *Enchytraeus crypticus* when exposed to FeCl<sub>3</sub> and Fe<sub>3</sub>O<sub>4</sub> NM, in LUFA 2.2 soil, at the density of 40 adult organism per replicate, in terms of reproductive output. The values are expressed as average ± standard error. Lines represent the models fit to data. \*: p<0.05 (Dunnett's), grey asterisk: 200 mg Fe/kg soil, black asterisk: 400 mg Fe/kg soil.
