# Supplementary material for: On the lifespan of Enchytraeus crypticus - impact of iron (nanomaterial and salt) on aging
Source: publisher site journal article supplement (doi:10.18632/aging.206134), 2024-10-24
Supplement: Supplementary file [file aging-v16i20-206134-supplementary-material-SD2.pdf]

## SUPPLEMENTARY TABLES

**Supplementary Table 1. Results for pH measurements in soil spiked with FeCl<sub>3</sub> or Fe<sub>3</sub>O<sub>4</sub> NM and aged over time (up to 202 days), for the test at density 1 (D1) and density 40 (D40).**

| Time (days)             | FeCl <sub>3</sub> (mg Fe/kg soil) |      |      | Fe <sub>3</sub> O <sub>4</sub> NM (mg Fe/kg soil) |      |      |
|-------------------------|-----------------------------------|------|------|---------------------------------------------------|------|------|
|                         | 0                                 | 200  | 400  | 0                                                 | 200  | 400  |
| <i>Density 1 (D1)</i>   |                                   |      |      |                                                   |      |      |
| 0                       | 6.2                               | 5.95 | 5.51 | 6.07                                              | 6.2  | 6.29 |
| 34                      | 5.94                              | 5.94 | 5.71 | 5.88                                              | 6.06 | 6.2  |
| 48                      | 5.53                              | 5.66 | 5.64 | 5.97                                              | 5.89 | 5.96 |
| 62                      | 5.97                              | 5.39 | 5.55 | 5.8                                               | 5.55 | 5.5  |
| 76                      | 5.81                              | 5.43 | 5.21 | 5.83                                              | 5.67 | 5.58 |
| 90                      | 5.52                              | 5.22 | 5.35 | 5.56                                              | 5.46 | 5.45 |
| 104                     | 5.51                              | 5.22 | 4.83 | 5.7                                               | 5.64 | 5.59 |
| 118                     | 5.53                              | 5.25 | 4.84 | 5.57                                              | 5.55 | 5.5  |
| 132                     | 5.59                              | 5.26 | 4.9  | 5.62                                              | 5.63 | 5.59 |
| 146                     | 5.55                              | 5.23 | 4.89 | 5.58                                              | 5.52 | 5.57 |
| 160                     | 5.67                              | 5.37 | 5    | 5.17                                              | 5.15 | 5.24 |
| 174                     | 5.1                               | 4.92 | 4.46 | 5.28                                              | 5.33 | 5.4  |
| 188                     | 5.41                              | 5.14 | 4.67 | 5.31                                              | 5.33 | 5.41 |
| 202                     | 5.21                              | 5.09 | 4.76 | 5.35                                              | 5.12 | 5.06 |
| <i>Density 40 (D40)</i> |                                   |      |      |                                                   |      |      |
| 0                       | 6.01                              | 5.47 | 5    | 6.16                                              | 5.98 | 5.9  |
| 34                      | 5.96                              | 5.47 | 5.08 | 6.17                                              | 5.89 | 5.82 |
| 62                      | 4.92                              | 5.11 | 4.96 | 5.19                                              | 5.55 | 5.29 |
| 90                      | 4.78                              | 4.51 | 4.93 | 5.56                                              | 5.09 | 4.86 |
| 118                     | 5.08                              | 4.59 | 4.77 | 5.5                                               | 4.86 | 4.74 |
| 146                     | 4.94                              | 4.61 | 4.27 | 5.6                                               | 5.31 | 5    |
| 174                     | 4.26                              | 4.41 | 4.1  | 5.31                                              | 4.96 | 4.84 |
| 202                     | 5.37                              | 5.07 | 4.85 | 5.35                                              | 5.03 | 4.88 |

**Supplementary Table 2. Summary of the Effect Time (ETx, in days, with 95% confidence intervals - CI) for survival and reproduction (as number of juveniles/adult), for *Enchytraeus crypticus*, exposed to 0, 200, and 400 mg Fe/kg soil of FeCl<sub>3</sub> and Fe<sub>3</sub>O<sub>4</sub> NM, in LUFA 2.2 soil at two different organisms' densities (1 organism (D1) and 40 organisms (D40)).**

| Material                          | Conc. | Endpoint     | ET10<br>(95% CI) | ET20<br>(95% CI) | ET50<br>(95% CI) | ET80<br>(95% CI) | Model & parameters                      |
|-----------------------------------|-------|--------------|------------------|------------------|------------------|------------------|-----------------------------------------|
| <i>Density 1 (D1)</i>             |       |              |                  |                  |                  |                  |                                         |
| FeCl <sub>3</sub>                 | 0     | Survival     | 148<br>(141-156) | 161<br>(155-166) | 186<br>(182-189) | 203 (197-210)    | Thres2P; S:1.48E-2, Y0:19.5, r2: 0.973  |
|                                   | 200   |              | 135<br>(115-154) | 173<br>(161-184) | 237<br>(210-265) | 302 (251-354)    | Log2P; S:5.34E-3, Y0:19.125, r2:0.862   |
|                                   | 400   |              | 116<br>(95-138)  | 148<br>(135-162) | 212<br>(191-232) | 257 (222-292)    | Thres2P; S:5.79E-3, Y0:20, r2: 0.869    |
| Fe <sub>3</sub> O <sub>4</sub> NM | 0     |              | 146<br>(137-155) | 161<br>(155-167) | 186<br>(182-190) | 212 (204-219)    | Log2P; S:1.37E-2, Y0:19.333, r2:0.97    |
|                                   | 200   |              | 148<br>(136-159) | 162<br>(154-170) | 185<br>(180-191) | 209 (199-219)    | Log2P; S:1.46E-2, Y0:20, r2:0.946       |
|                                   | 400   |              | 137<br>(131-143) | 150<br>(146-154) | 176<br>(173-179) | 195 (190-199)    | Thres2P; S:1.42E-2, Y0:19.889, r2:0.988 |
| FeCl <sub>3</sub>                 | 0     | Reproduction | 54<br>(40-67)    | 70<br>(60-80)    | 97<br>(92-104)   | 125 (116-134)    | Log2P; S:1.26E-2, Y0:162.75, r2:0.966   |
|                                   | 200   |              | 75<br>(68-82)    | 87 (82-92)       | 108 (104-111)    | 128 (123-133)    | Log2P; S:1.69E-2, Y0: 137.42, r2:0.99   |
|                                   | 400   |              | 101<br>(92-110)  | 110 (104-117)    | 126 (122-130)    | 142 (136-149)    | Log2P; S:2.17E-2, Y0:59, r2:0.984       |
| Fe <sub>3</sub> O <sub>4</sub> NM | 0     |              | 69<br>(53-84)    | 86 (75-97)       | 120 (113-127)    | 145 (134-156)    | Thres2P; S:1.07E-2, Y0:162.02, r2:0.965 |
|                                   | 200   |              | 66<br>(57-75)    | 80 (74-87)       | 109 (104-113)    | 129 (123-135)    | Thres2P; S:1.29E-2, Y0:162.35, r2:0.986 |
|                                   | 400   |              | 70<br>(57-83)    | 86 (76-95)       | 117 (111-123)    | 139 (129-148)    | Thres2P; S:1.19E-2, Y0:168.3, r2:0.972  |
| <i>Density 40 (D40)</i>           |       |              |                  |                  |                  |                  |                                         |
| FeCl <sub>3</sub>                 | 0     | Survival     | n.e.             | n.e.             | n.e.             | n.e.             |                                         |
|                                   | 200   |              | n.e.             | n.e.             | n.e.             | n.e.             |                                         |
|                                   | 400   |              | n.e.             | n.e.             | n.e.             | n.e.             |                                         |
| Fe <sub>3</sub> O <sub>4</sub> NM | 0     |              | 212 (167-257)    | 229<br>(139-319) | 258<br>(86-431)  | 288<br>(31-544)  | Log2P; S:1.19E-2, Y0:34.75, r2:0.1      |
|                                   | 200   |              | 198<br>(190-206) | 207<br>(196-218) | 222<br>(185-259) | 237<br>(174-300) | Log2P; S:2.31E-2, Y0:36.958, r2:0.429   |
|                                   | 400   |              | n.e.             | n.e.             | n.e.             | n.e.             |                                         |
| FeCl <sub>3</sub>                 | 0     | Reproduction | 41<br>(-25-108)  | 87<br>(44-129)   | 165<br>(140-189) | 242<br>(184-301) | Log2P; S:4.46E-3, Y0:123, r2:0.516      |
|                                   | 200   |              | 58<br>(34-81)    | 81<br>(64-97)    | 126<br>(117-136) | 159<br>(144-174) | Thres2P; S:8.04E-3, Y0:113, r2:0.856    |
|                                   | 400   |              | 64<br>(43-86)    | 84<br>(69-100)   | 119<br>(109-128) | 153<br>(138-168) | Log2P; S: 1.02E-2, Y0: 84, r2:0.846     |
| Fe <sub>3</sub> O <sub>4</sub> NM | 0     |              | 94<br>(56-133)   | 124<br>(98-150)  | 182<br>(161-203) | 224<br>(185-263) | Thres2P; S:6.32E-3, Y0: 105, r2:0.581   |
|                                   | 200   |              | 71<br>(16-126)   | 112<br>(78-147)  | 194<br>(162-226) | 252<br>(189-316) | Thres2P; S:4.52E-3, Y0: 108, r2:0.457   |
|                                   | 400   |              | 81<br>(49-113)   | 110<br>(88-132)  | 169<br>(153-184) | 210<br>(182-234) | Log2P; S:6.33E-3, Y0:122, r2:0.672      |

The models used are Logistic 2 parameters (Log2P) or Threshold sigmoid 2 parameters (Thres2P). S: slope; Y0: top point; n.e.: no effect.
